# Supplementary material for: In situ fabrication and design of a novel electrochemical sensor based on the Ag3.84Sn3S8@rGO nanocomposite for competitive ultra-detection of metronidazole in human urine
Source: Royal Society of Chemistry journal article supplement (doi:10.1039/d3ma00076a), 2023-01-01
Supplement: d3ma00076a1.pdf [file d3ma00076a1.pdf]

1

## Supporting Information

2 **In-situ fabrication and designing of a novel electrochemical sensor based on**  
3 **Ag<sub>3.84</sub>Sn<sub>3</sub>S<sub>8</sub>@rGO nanocomposite for a competitive ultra-detection of metronidazole in**  
4 **human urine**

5 **Jit Satra<sup>a</sup>, Papri Mondal<sup>a</sup>, Gopala Ram Bhadu<sup>b</sup> and Bibhutosha Adhikary<sup>\*a</sup>**

6 \* Corresponding authors

7 <sup>a</sup> Department of Chemistry, Indian Institute of Engineering Science and Technology, Shibpur,  
8 Howrah 711 103, West Bengal, India

9 Email: [bibutoshadhikary@gmail.com](mailto:bibutoshadhikary@gmail.com)

10 <sup>b</sup> Department of Analytical and Environmental Science Division and Centralized Instrument  
11 Facility, Gijubhai Badheka Marg, Bhavnagar 364021, Gujarat, India

12

13

14

15

16

17

## 18 **Chemicals and materials**

19 H<sub>3</sub>PO<sub>4</sub> (≥ 85%), KMNO<sub>4</sub>, HCl (37%) were purchased from Spectrochem. Pvt. Ltd. (India).  
20 Graphite powder (<20 mM), H<sub>2</sub>SO<sub>4</sub> (99.99%), L-Ascorbic acid (99%), AgNO<sub>3</sub> (98%),  
21 SnCl<sub>2</sub>·2H<sub>2</sub>O (99.99%), CH<sub>4</sub>N<sub>2</sub>S (99%), EtOH (99.99%), nafion (5 wt%), α-Al<sub>2</sub>O<sub>3</sub>, 0.45μm  
22 PVDF hydrophilic membrane, MNZ, ODZ, OXN, CFX, TDE, IZE, 5-NIZ, 4-NP, 4-NB, Hg and  
23 UA were purchased from Sigma-Aldrich (India). All experiments were performed in DI water.

## 24 **Physical Measurement**

25 Powder X-ray diffraction studies have been done using a PAN analytical X-ray diffractometer  
26 having monochromatic CuKα radiation ( $\lambda = 1.540598 \text{ \AA}$ ). Infrared spectra were obtained in the  
27 range of 4000–400 cm<sup>-1</sup> by JASCO FT-IR-460 Plus. To evaluate the elemental composition,  
28 Energy dispersed X-ray (EDX) analysis was performed using a JEOL JSM-7100F. Shape and  
29 morphologies were studied using a radiation source JEOL JEM-2100 transmission electron  
30 microscope (TEM) working at 200 kV. X-ray photoelectron spectroscopy (XPS) was performed  
31 by Perkin-Elmer Physical Electronics 5600 spectrometer. Diffuse reflectance spectroscopy  
32 (DRS) was undergone by Agilent Cary 5000. The surface area of the samples has been obtained  
33 by an automatic gas adsorption/desorption analyzer (Quantachrome Instruments, version 3.01)  
34 with N<sub>2</sub> as adsorbate. The corresponding samples were degassed in vacuum at 220 °C for 24 h  
35 before test. The specific surface areas of the samples were calculated by the Brunauer-Emmett-  
36 Teller (BET) method using the adsorption S-3 branch in P<sub>relative</sub> range from 0.05-0.30.

## 37 **Fabrication of ITO coated glass slides with catalysts for chronoampermetric measurement**

38 The modification was done by the following procedures; (1) the ITO coated glass slides are  
39 thoroughly cleaned in soap water followed by acetone and iso-propanol by ultrasonication for 12

40 hours and dried in hot air oven at 100 °C, (2) the catalyst was dispersed in toluene and  
41 ultrasonicated for 1 hour, (3) then the fabrication was done by spin-coating method in which  
42 each time 100 µL of as prepared dispersed solution was dropped onto the surface of the glass  
43 slide and spin-coated by 10000 RPM and lastly (4) the fabricated glass slides were dried over hot  
44 plate at 120 °C.

#### 45 **Photocatalytic activity measurement**

46 The whole photocatalytic reaction was performed in a 50 ml beaker and the MNZ concentration  
47 was maintained at 30 mg/L (recorded on a JASCO V-530 UV-Vis spectrophotometer). The  
48 catalyst concentration was optimized to 20 mg/ml by varying five different set of concentration  
49 and the illuminating white light power density was maintained at 1 sun (100 mW·cm<sup>-2</sup>) which is  
50 equipped with 420 nm cut-off filter (Newport-Oriel Instruments, USA) to access only visible  
51 light. After each photocatalytic cycle the main mixture was filtered by 0.45 µm PVDF  
52 membranes and the absorption spectra were studied. The reusability of the photocatalyst was  
53 evaluated only after recollecting the catalyst followed by washing through centrifugation  
54 repeatedly and then drying at the end of each cycle.

#### 55 **Fabrication of working electrode and electrochemical experiments**

56 Before modification, the conducting surface of the glassy carbon electrode (GCE) (here the  
57 working electrode) was vertically immersed and thoroughly cleaned by ultrasonication in  
58 acetone then isopropanol followed by DI water for a whole day. Then the electrode surface was  
59 polished with  $\alpha$ -Al<sub>2</sub>O<sub>3</sub> (with different size) slurry in DI water and dried overnight in a closed  
60 glass vessel. Next for the conducting layer of the sensor a suspension was made by mixing 0.5%  
61 of nafion of 1 ml and NC in DI water. To homogenize, it was ultrasonicated for 2 hr. Then 10 µL  
62 of the suspension was drop casted onto the cleaned and polished electrode surface. It was then

63 allowed to dry in hot air oven for 30 mins and the electrodes were rinsed in DI water slowly to  
64 remove lightly attached NC particles. It is to be noted that the surface area of the working  
65 electrode was maintained at 0.126 cm<sup>2</sup>. The characteristic electrochemical parameters like  
66 concentration of analyte, scan rate and pH value were optimized by CV in PBS electrolyte. The  
67 whole electrochemical experiments were undergone by CHI 7014E workstation through three  
68 electrode system where reference electrode and counter electrode are Ag/AgCl and Pt wire.

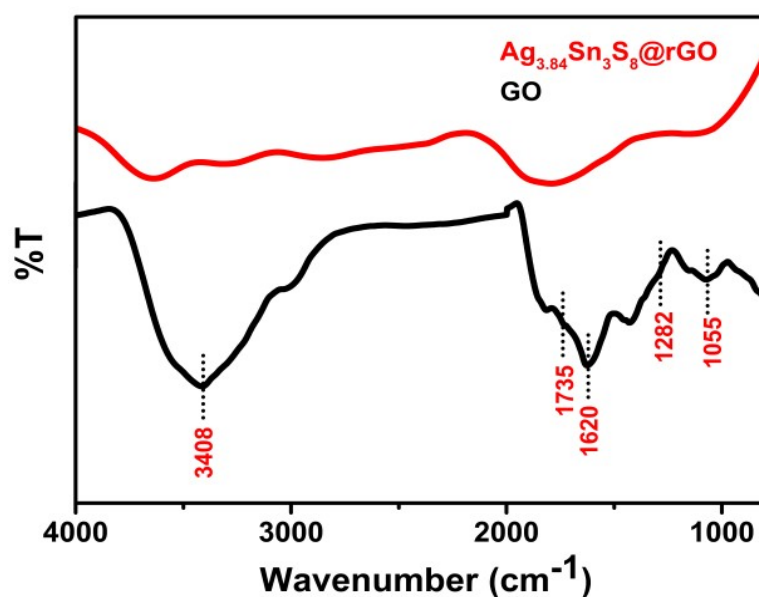

76 **Fig. S1** FTIR spectra for GO and  $Ag_{3.84}Sn_3S_8@rGO_{0.5}$  NC

77

78

79

80

81

82

83

84  
85  
86  
87  
88  
89

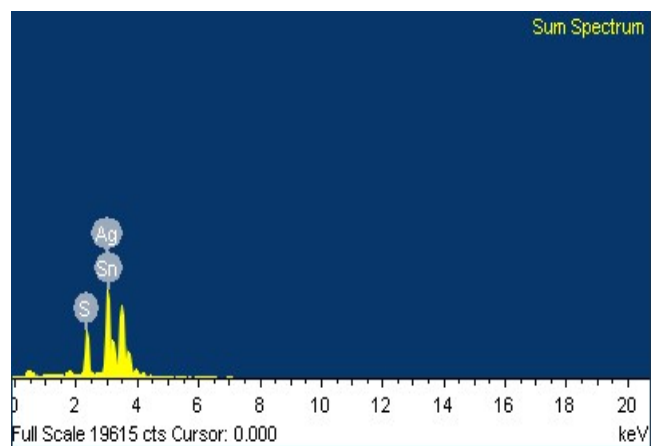

90 **Fig. S2** EDX spectra for pure  $\text{Ag}_{3.84}\text{Sn}_3\text{S}_8$

91  
92  
93  
94  
95  
96  
97  
98  
99  
100  
101  
102  
103

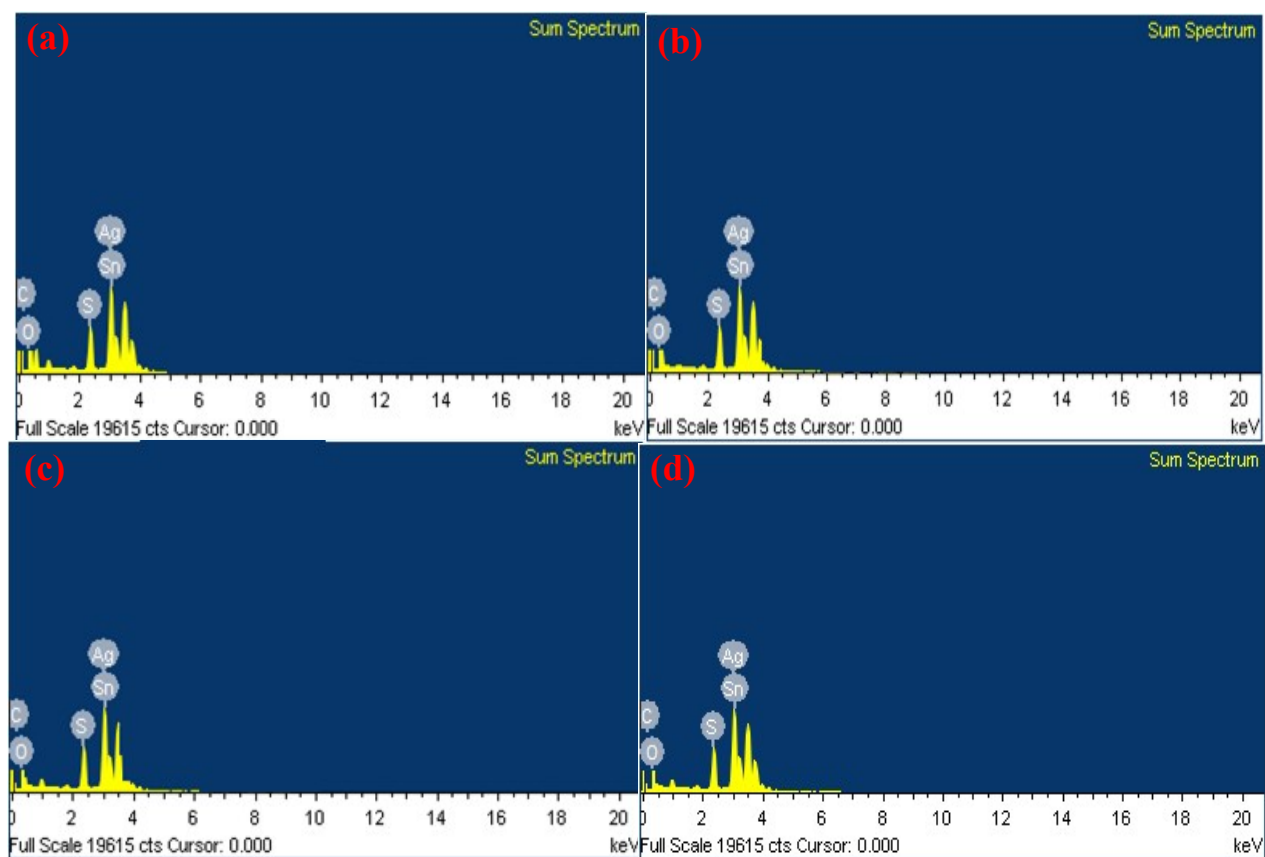

104 **Fig. S3** EDX spectra for (a-d)  $\text{Ag}_{3.84}\text{Sn}_3\text{S}_8$ @ $\text{rGO}_{(0.05-0.5)}$  NCs

105  
106  
107

108 Table S1 Elemental compositions of pure and four different  $\text{Ag}_{3.84}\text{Sn}_3\text{S}_8@r\text{GO}$  NCs

|                                                           | Atomic % |
|-----------------------------------------------------------|----------|----------|----------|----------|----------|
| Materials                                                 | Ag       | Sn       | S        | C        | O        |
| $\text{Ag}_{3.84}\text{Sn}_3\text{S}_8$                   | 22.30    | 20.81    | 56.94    | 0.00     | 0.00     |
| $\text{Ag}_{3.84}\text{Sn}_3\text{S}_8@r\text{GO}_{0.05}$ | 22.99    | 21.01    | 55.65    | 0.30     | 0.10     |
| $\text{Ag}_{3.84}\text{Sn}_3\text{S}_8@r\text{GO}_{0.1}$  | 21.90    | 20.71    | 56.67    | 0.55     | 0.22     |
| $\text{Ag}_{3.84}\text{Sn}_3\text{S}_8@r\text{GO}_{0.25}$ | 22.95    | 21.03    | 54.02    | 1.45     | 0.55     |
| $\text{Ag}_{3.84}\text{Sn}_3\text{S}_8@r\text{GO}_{0.5}$  | 20.95    | 18.50    | 57.25    | 2.57     | 0.73     |

109

110

111

112

113

114

115

116

117

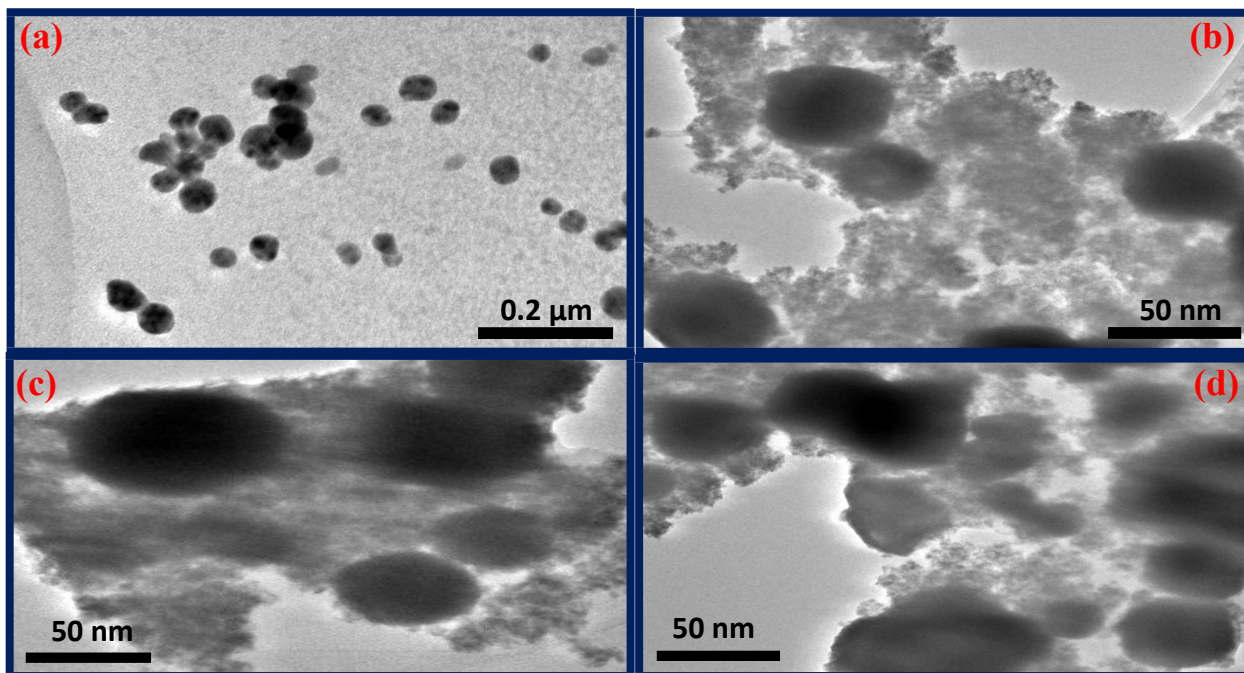

118 Fig. S4 (a) TEM images of (a) pure  $\text{Ag}_{3.84}\text{Sn}_3\text{S}_8$  (b-d)  $\text{Ag}_{3.84}\text{Sn}_3\text{S}_8@r\text{GO}_{0.05/0.1/0.25}$  NCs

119

120

121

122

123

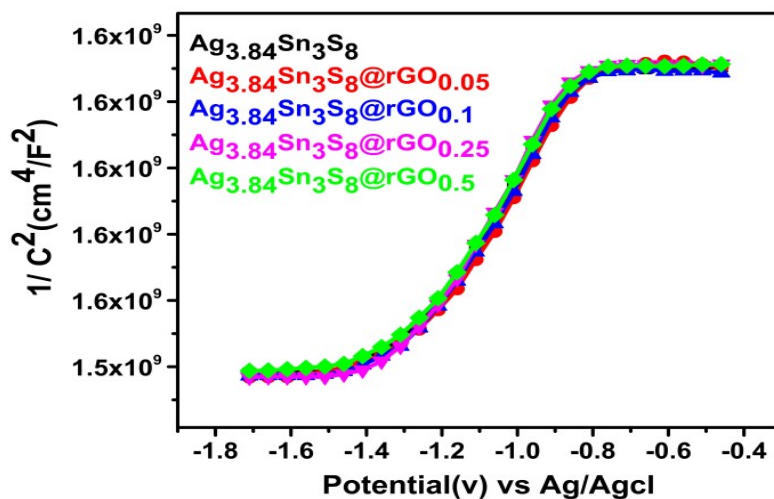

124 **Fig. S5** Mott-Schottky plots of as synthesized materials

125 **Table S2** The characteristic parameters obtained from Mott-Schottky plots

| Materials                                                 | $E_{fb}$<br>(V vs RHE) | Carrier Density<br>( $10^{10} \text{ cm}^{-3}$ ) |
|-----------------------------------------------------------|------------------------|--------------------------------------------------|
| $\text{Ag}_{3.84}\text{Sn}_3\text{S}_8$                   | -0.800                 | 1.30                                             |
| $\text{Ag}_{3.84}\text{Sn}_3\text{S}_8@\text{rGO}_{0.05}$ | -0.796                 | 1.42                                             |
| $\text{Ag}_{3.84}\text{Sn}_3\text{S}_8@\text{rGO}_{0.1}$  | -0.791                 | 1.49                                             |
| $\text{Ag}_{3.84}\text{Sn}_3\text{S}_8@\text{rGO}_{0.25}$ | -0.785                 | 1.67                                             |
| $\text{Ag}_{3.84}\text{Sn}_3\text{S}_8@\text{rGO}_{0.5}$  | -0.788                 | 1.51                                             |

126

127 **E (eV)**      **E (V) Vs. RHE**

128 -2.5      -2.0

128 -3.0      -1.5

129 -3.5      -1.0

129 -4.0      -0.5

130 -4.5      0.0

130 -5.0      0.5

131 -5.5      1.0

131 -6.0      1.5

131 -6.5      2.0

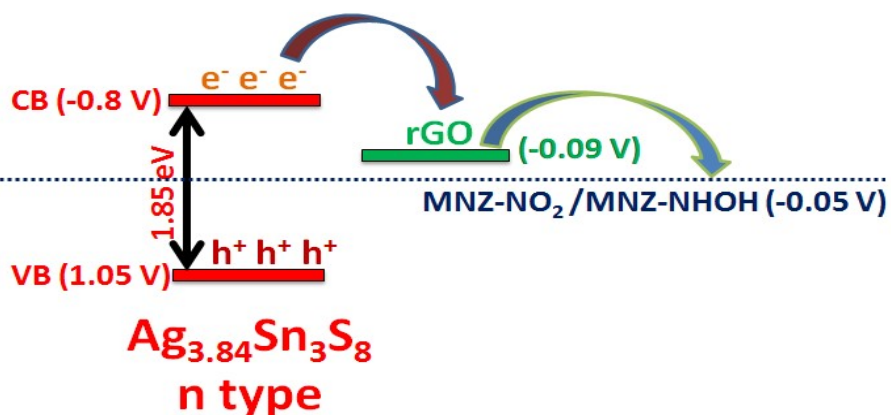

132 **Fig. S6** Probable energy profile diagram for CB and VB levels of the catalyst and catalytic  
133 reaction pathway for detection and degradation of MNZ

134 With compare to pure rGO and  $\text{Ag}_{3.84}\text{Sn}_3\text{S}_8$  [Fig. S8 (a) and (b)] the surface area is significantly  
135 increased in case of composites [Fig. S8 (c-f)]. Among the NCs;  $\text{Ag}_{3.84}\text{Sn}_3\text{S}_8@\text{rGO}_{0.25}$  [Fig. S8  
136 (e)] has the highest indicating more active reaction sites.<sup>2</sup> On the other hand by employing BJH  
137 analysis pore size distribution has been measured and it reveals that for pure  $\text{Ag}_{3.84}\text{Sn}_3\text{S}_8$ , the  
138 pore size is 21 nm but in presence of rGO the pore size becomes between 15-18 nm which  
139 further support the composite formation in hybrid material.<sup>3</sup>

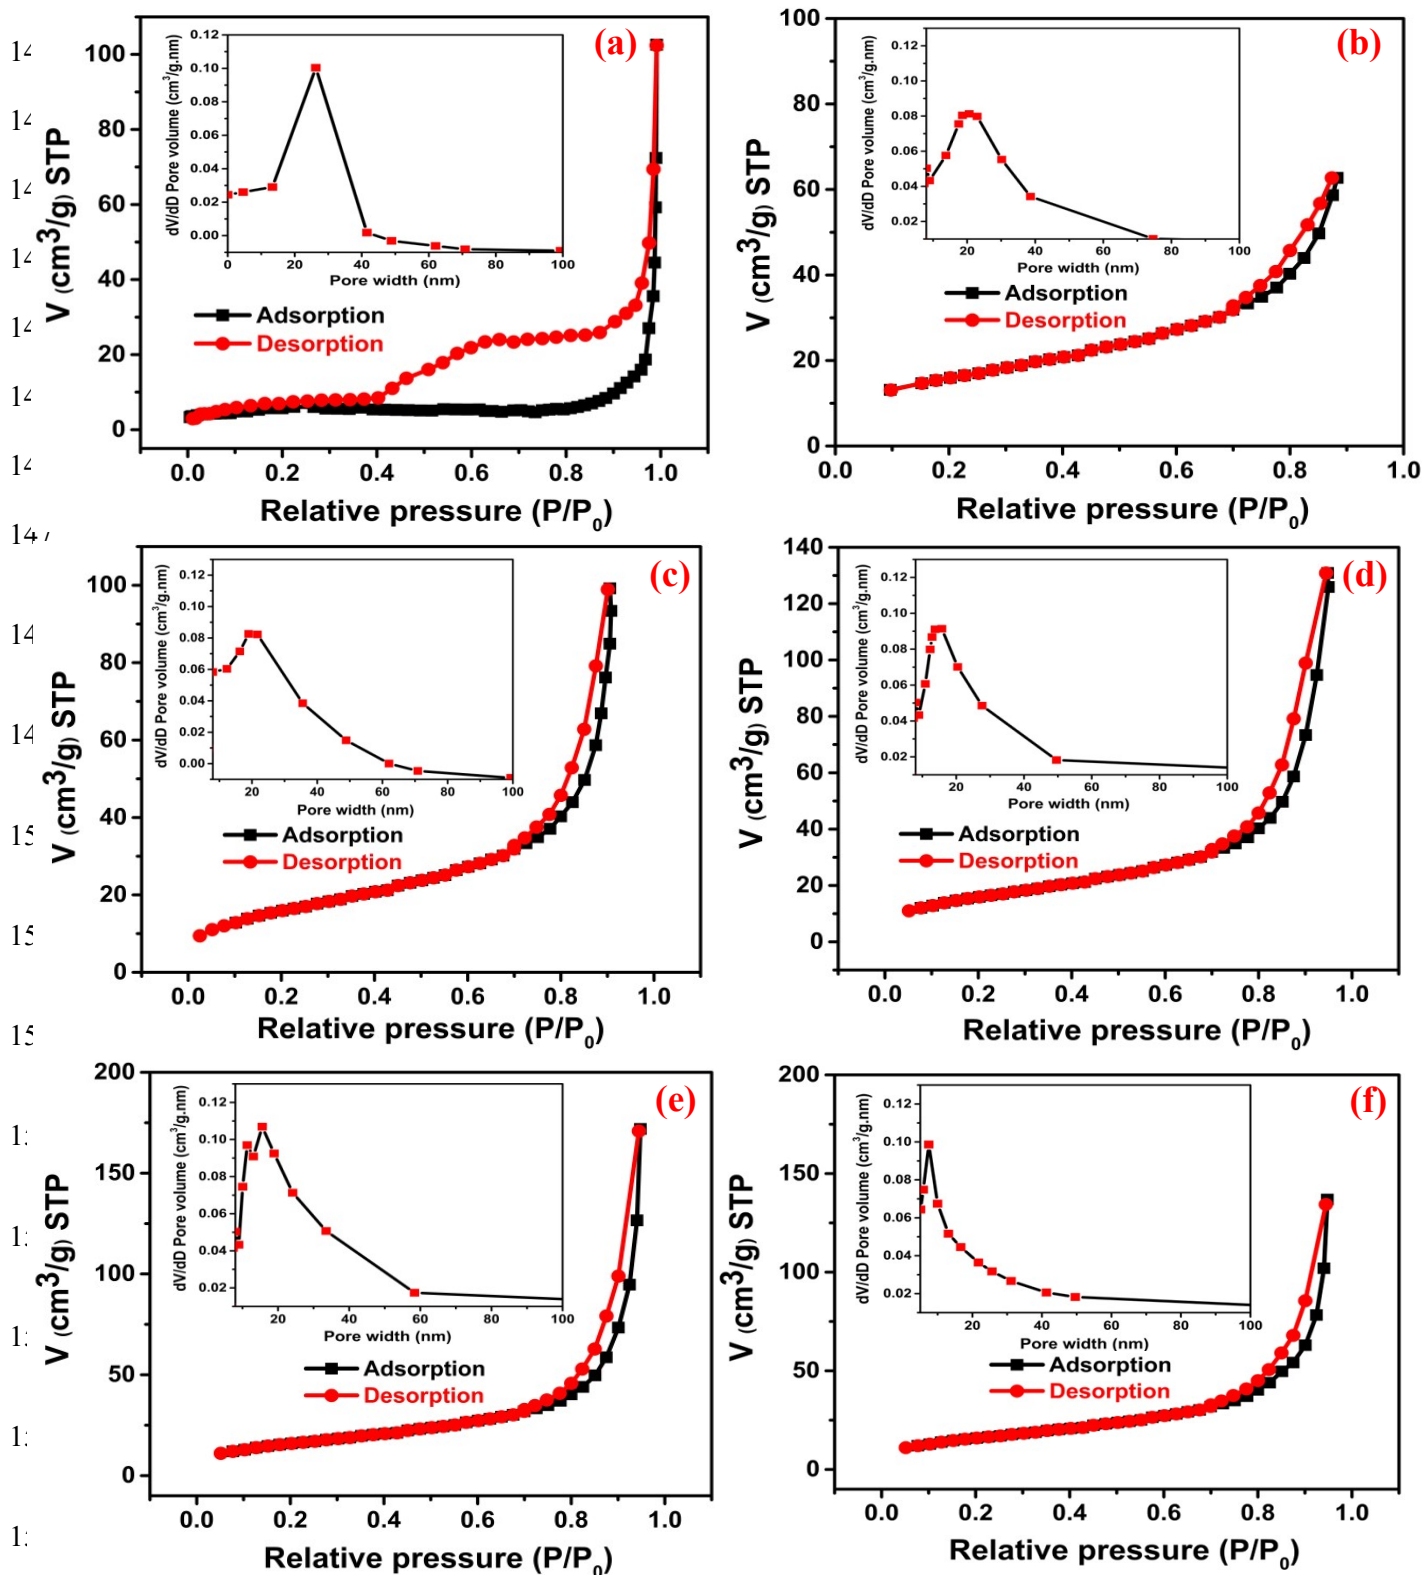

158 **Fig. S7** BET isotherms and pore size distribution analysis for (a) rGO (b) pure  $\text{Ag}_{3.84}\text{Sn}_3\text{S}_8$  (c-f)

159  $\text{Ag}_{3.84}\text{Sn}_3\text{S}_8$ @ $\text{rGO}_{(0.05-0.5)}$  NCs



160 Table S3 Surface area parameters obtained from BET isotherm analysis

| Materials                                                              | BET surface area (m <sup>2</sup> /gm) | Pore size (nm) |
|------------------------------------------------------------------------|---------------------------------------|----------------|
| rGO                                                                    | 75                                    | 25             |
| Ag <sub>3.84</sub> Sn <sub>3</sub> S <sub>8</sub>                      | 53                                    | 21             |
| Ag <sub>3.84</sub> Sn <sub>3</sub> S <sub>8</sub> @rGO <sub>0.05</sub> | 79                                    | 19             |
| Ag <sub>3.84</sub> Sn <sub>3</sub> S <sub>8</sub> @rGO <sub>0.1</sub>  | 111                                   | 18             |
| Ag <sub>3.84</sub> Sn <sub>3</sub> S <sub>8</sub> @rGO <sub>0.25</sub> | 147                                   | 16             |
| Ag <sub>3.84</sub> Sn <sub>3</sub> S <sub>8</sub> @rGO <sub>0.5</sub>  | 123                                   | 15             |

167

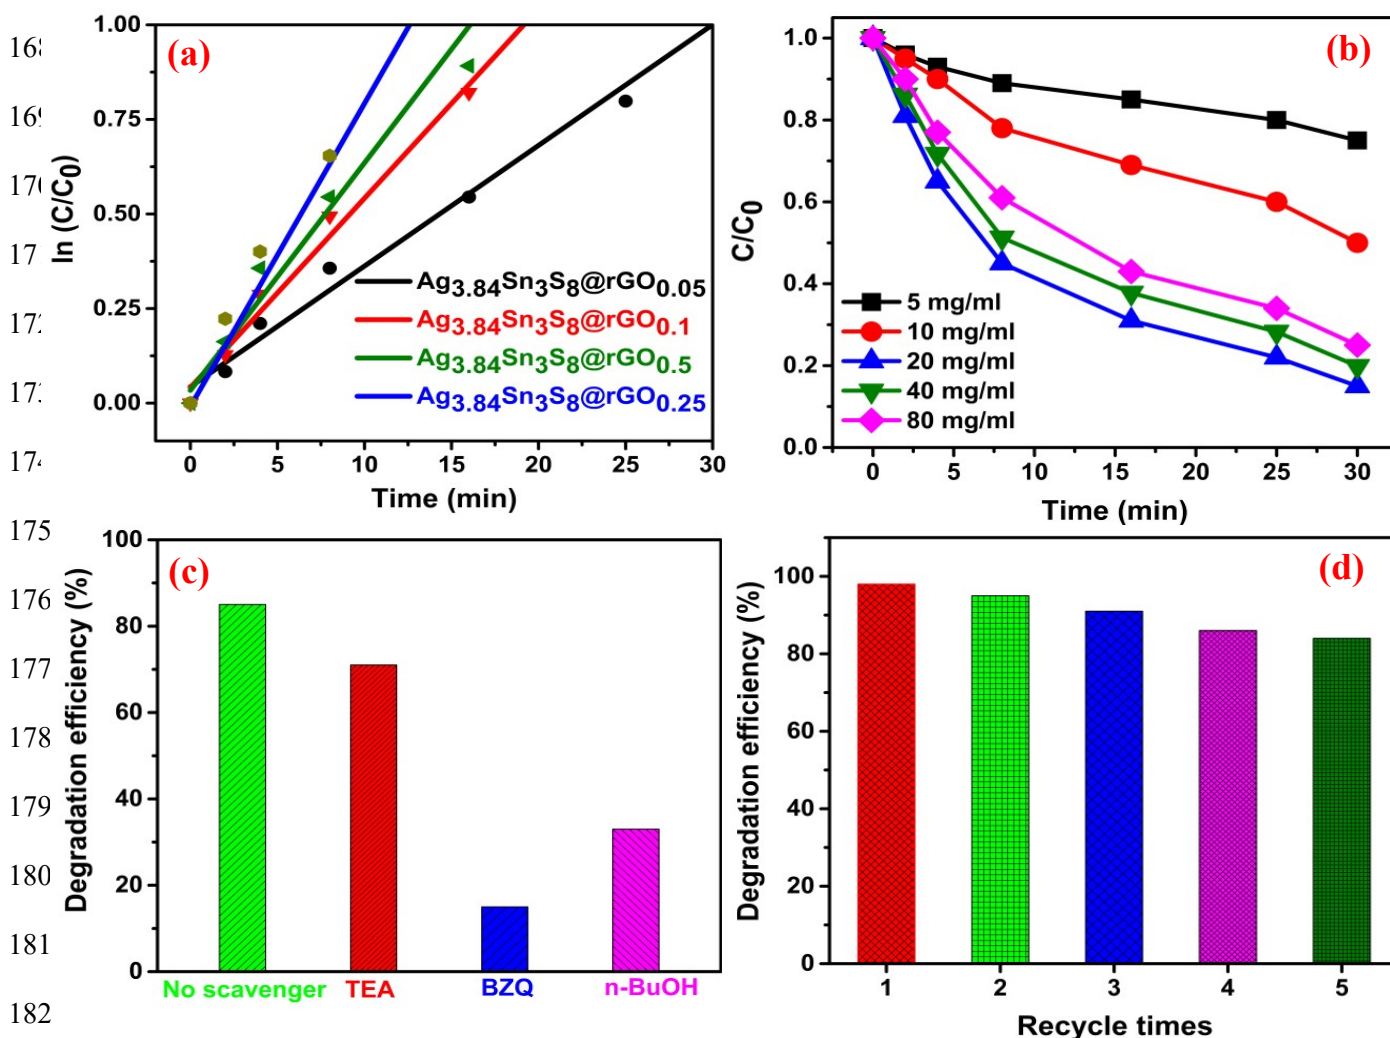

183 Fig. S8 (a) Kinetic study (b) effect of dosage of catalyst on photocatalytic performance (c) effect

184 of scavengers of reactive species involved in the photodegradation (d) stability test 85

185 **Table S4 Rate constants for the as prepared composite materials**

| Materials                                                              | Rate constants (k)<br>(min <sup>-1</sup> ) |
|------------------------------------------------------------------------|--------------------------------------------|
| <b>Ag<sub>3.84</sub>Sn<sub>3</sub>S<sub>8</sub>@rGO<sub>0.05</sub></b> | <b>0.0290</b>                              |
| <b>Ag<sub>3.84</sub>Sn<sub>3</sub>S<sub>8</sub>@rGO<sub>0.1</sub></b>  | <b>0.0560</b>                              |
| <b>Ag<sub>3.84</sub>Sn<sub>3</sub>S<sub>8</sub>@rGO<sub>0.25</sub></b> | <b>0.0825</b>                              |
| <b>Ag<sub>3.84</sub>Sn<sub>3</sub>S<sub>8</sub>@rGO<sub>0.5</sub></b>  | <b>0.0625</b>                              |

186

187 **The plausible reaction pathway for the photodegradation of MNZ**

188 The mechanistic pathway is a crucial parameter to recognize the stepwise progress of any  
 189 catalytic reaction. In accordance with the obtained results and anticipation from the previously  
 190 reported studies, we have assumed the following reaction pathway for photodegradation of  
 191 MNZ. At first, upon illumination of visible light the e<sup>-</sup>-h<sup>+</sup> pair charge separation happens [Eq.  
 192 S1]. Then the e<sup>-</sup><sub>CB</sub> and h<sup>+</sup><sub>VB</sub> convert the O<sub>2</sub>, H<sub>2</sub>O to O<sub>2</sub><sup>-</sup> and ·OH respectively [Eq. S2 and S3].  
 193 Then O<sub>2</sub><sup>-</sup> reacts with H<sup>+</sup> to form ·OH<sub>2</sub> [Eq. S4]. All these radicals are ROS which degrade MNZ  
 194 to its water soluble fragmentations (intermediates) and further to CO<sub>2</sub> and H<sub>2</sub>O [Eq. S5-S7].

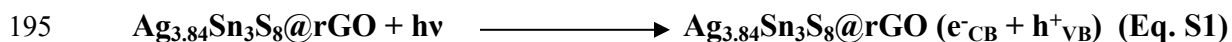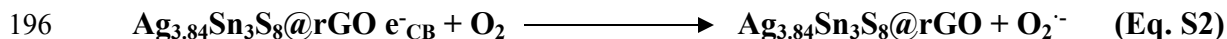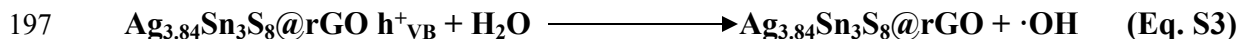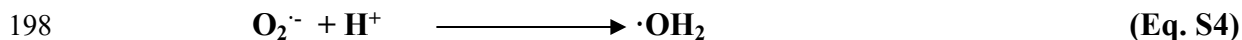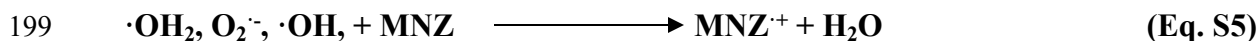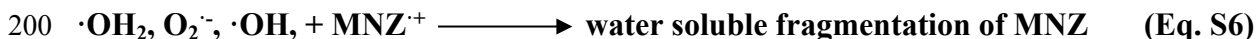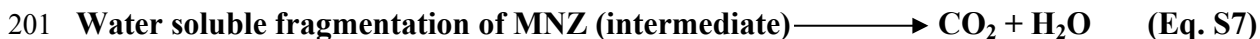

202

203 **Table S5 Comparative study for photodegradation of MNZ by different photocatalysts**

204

| <b>Photocatalysts</b>                                                     | <b>Catalyst<br/>(g/L)</b> | <b>MNZ<br/>(mg/L)</b> | <b>Light Source<br/>(W/m<sup>2</sup>)</b> | <b>Time<br/>(min)</b> | <b>k<sub>obs</sub><br/>(min<sup>-1</sup>)</b> | <b>Year</b> | <b>Ref.</b>          |
|---------------------------------------------------------------------------|---------------------------|-----------------------|-------------------------------------------|-----------------------|-----------------------------------------------|-------------|----------------------|
| <b>TiO<sub>2</sub></b>                                                    | <b>3</b>                  | <b>80</b>             | <b>125 (UV)</b>                           | <b>180</b>            |                                               | <b>2015</b> | <b>4</b>             |
| <b>TiO<sub>2</sub></b>                                                    | <b>0.5</b>                | <b>80</b>             | <b>125 (UV)</b>                           | <b>120</b>            | <b>0.0233</b>                                 | <b>2015</b> | <b>5</b>             |
| <b>Fe<sup>0</sup>/graphene-TiO<sub>2</sub> NW</b>                         | <b>1</b>                  | <b>35</b>             | <b>20 (UV)</b>                            | <b>50</b>             | <b>0.083</b>                                  | <b>2018</b> | <b>6</b>             |
| <b>TiO<sub>2</sub>-doped Fe<sup>+3</sup></b>                              | <b>0.5</b>                | <b>80</b>             | <b>125 (UV)</b>                           | <b>120</b>            | <b>0.027</b>                                  | <b>2019</b> | <b>7</b>             |
| <b>P-doped g-C<sub>3</sub>N<sub>4</sub>/Co<sub>3</sub>O<sub>4</sub></b>   | <b>1</b>                  | <b>10</b>             | <b>250 (Vis)</b>                          | <b>180</b>            |                                               | <b>2019</b> | <b>8</b>             |
| <b>TiO<sub>2</sub>/ZnO</b>                                                | <b>1.5/0.5</b>            | <b>10/10</b>          | <b>100 (UV)</b>                           | <b>60</b>             | <b>0.045/0.1<br/>24</b>                       | <b>2019</b> | <b>9</b>             |
| <b>D-g-C<sub>3</sub>N<sub>4</sub>-Bi<sub>5</sub>O<sub>7</sub>I</b>        | <b>0.8</b>                | <b>15</b>             | <b>300 (Vis)</b>                          | <b>360</b>            |                                               | <b>2019</b> | <b>10</b>            |
| <b>CuBi<sub>2</sub>O<sub>4</sub>/CuO</b>                                  | <b>1<br/>mg/mL</b>        | <b>50</b>             | <b>100 mW/cm<sup>2</sup></b>              | <b>120</b>            | <b>0.0036</b>                                 | <b>2020</b> | <b>11</b>            |
| <b>Fe<sub>3</sub>O<sub>4</sub>/TiO<sub>2</sub>/BC</b>                     | <b>0.35</b>               | <b>10</b>             | <b>16 (UV)</b>                            | <b>45</b>             | <b>0.074</b>                                  | <b>2020</b> | <b>12</b>            |
| <b>Fe<sub>3</sub>O<sub>4</sub>/rGO<sub>4</sub>(%)/TiO<sub>2</sub></b>     | <b>0.75</b>               | <b>20</b>             | <b>150 (Vis)</b>                          | <b>120</b>            | <b>0.0092</b>                                 | <b>2020</b> | <b>13</b>            |
| <b>Ag<sub>3.84</sub>Sn<sub>3</sub>S<sub>8</sub>@rGO<sub>0.25</sub>(%)</b> | <b>20 mg/mL</b>           | <b>30</b>             | <b>100 mW/cm<sup>2</sup></b>              | <b>30</b>             | <b>0.0825</b>                                 | <b>2023</b> | <b>This<br/>work</b> |

205

206

207

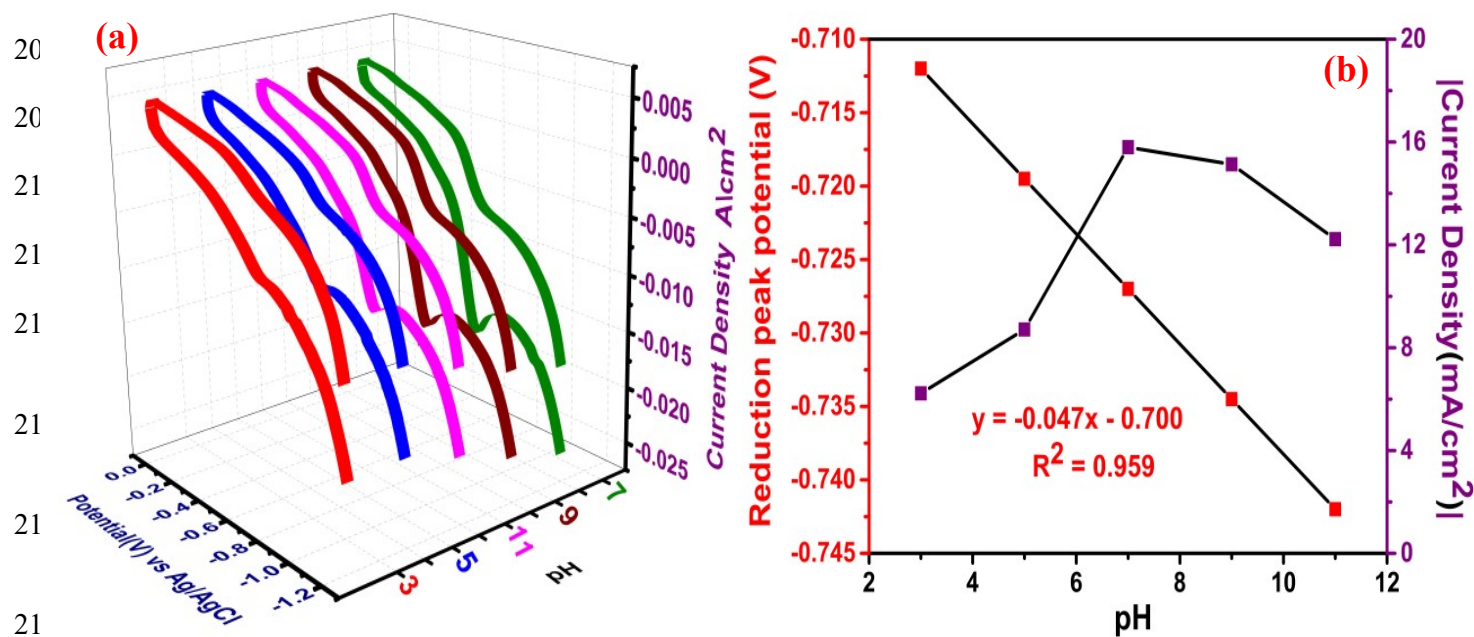

216 **Fig. S9** (a) CV study for MNZ sensing varying pH from 3.0 to 11.0 (b) calibration plot for  
 217 reduction peak potential vs pH and effect of pH on peak current density

218 **Table S6** The MNZ recovery analysis by  $\text{Ag}_{3.84}\text{Sn}_3\text{S}_8@\text{rGO}_{0.25(\%)}$  modified sensor (n = 3) from  
 219 spiked real samples

| Real Samples | Added (nM) | Detected (nM) | Recovery (%) |
|--------------|------------|---------------|--------------|
| Lake Water   | 50         | 47.8          | 95.6         |
|              | 100        | 98.4          | 98.4         |
|              | 200        | 196.5         | 98.2         |
| Human Urine  | 50         | 48.9          | 97.8         |
|              | 100        | 99.1          | 99.1         |
|              | 200        | 198.7         | 99.3         |

220

221

222

223 **References**

- 224 (1) B. Yang, X. Zuo, P. Chen, L. Zhou, X. Yang, H. Zhang, G. Li, M. Wu, S. Jin and X. S.  
225 Chen, *ACS Appl. Mater. Interfaces*, 2015, **7**, 137-143
- 226 (2) D. C. T. Nguyen, K. Y. Cho and W. C. Oh, *RSC Adv.*, 2017, **7**, 29284–29294.
- 227 (3) N. A. Zubir, C. Yacou, J. Motuzas, X. Zhang and J. C. Diniz Da Costa, *Sci. Rep.*, 2014, **4**,  
228 1–8.
- 229 (4) N. Okhovat, M. Hashemi and A. A. Golpayegani, *J. Mater. Environ. Sci.*, 2015, **6**,  
230 792–799.
- 231 (5) M. Farzadkia, E. Bazrafshan, A. Esrafil, J. K. Yang and M. Shirzad-Siboni, *J. Environ.*  
232 *Heal. Sci. Eng.*, 2015, **13**, 1–8.
- 233 (6) X. Wang, A. Wang, M. Lu and J. Ma, *Chem. Eng. J.*, 2018, **337**, 372–384.
- 234 (7) M. Malakootian, N. Olama, M. Malakootian and A. Nasiri, *Int. J. Environ. Sci. Technol.*,  
235 2019, **16**, 4275–4284.
- 236 (8) Z. Zhao, J. Fan, X. Deng and J. Liu, *Chem. Eng. J.*, 2019, **360**, 1517–1529.
- 237 (9) M. L. Tran, C. C. Fu and R. S. Juang, *Environ. Sci. Pollut. Res.*, 2018, **25**, 28285–28295.
- 238 (10) M. Salimi, A. Esrafil, H. R. Sobhi, M. Behbahani, M. Gholami, M. Farzadkia, A. J. Jafari  
239 and R. R. Kalantary, *ChemistrySelect*, 2019, **4**, 10288–10295.
- 240 (11) C. Nogueira, L. E. Gomes, J. A. P. Ferencz, J. E. F. S. Rodrigues, R. V. Gonçalves and H.  
241 Wender, *J. Phys. Chem. C*, 2019, **123**, 25680–25690.
- 242 (12) F. Asgharzadeh, M. Gholami, A. J. Jafari, M. Kermani, H. Asgharnia and R. R. Kalantary,  
243 *Desalin. Water Treat.*, 2020, **175**, 304–315.
- 244 (13) F. Bashiri, M. Khejri, R. R. Kalantary and B. Kakavandi, *Journal of Molecular Liquids.*,  
245 2020, **314**, 113608.

246
